# Supplementary material
Source: PubMed Central journal article supplement (PMC6527617)
Supplement: 12264_2019_354_MOESM1_ESM.pdf [file 12264_2019_354_MOESM1_ESM.pdf]

## **Supplementary Material and Methods**

### **RT-QuIC Assay**

RT-QuIC was conducted in a black, 96-well, optical-bottomed plate (Nunc, Roskilde, Denmark, 265301) on a FLUOstar plate reader (BMG Labtech, Offenburg, Germany). CSF samples (10  $\mu$ L) were mixed with 10  $\mu$ g recombinant hamster PrP23-231 (rPrP<sup>C</sup>) in reaction buffer containing 10 mmol/L phosphate-buffered saline, 170 mM NaCl, 10  $\mu$ M thioflavin T (ThT), 10  $\mu$ mol/L EDTA, and 1 ng SDS. The final reaction volume was 100  $\mu$ l. Each tested sample was duplicated. Each reaction contained blank (reaction buffer), negative (1  $\mu$ L 10% brain homogenate from normal hamster), and positive controls (1  $\mu$ L 10% brain homogenate from scrapie agent 263K-infected hamster). The working conditions were: temperature, 50°C; vibration speed, 900 rpm; vibration/incubation time, 90/30 s; total reaction time, 90 h. ThT fluorescence (450 nm excitation and 480 nm emission) was automatically measured every 30 min as relative fluorescence units (rfu). The cutoff value was set as the average value of the negative controls plus 3 times the standard deviation (mean  $\pm$  3 SD). A sample was considered to be positive when the two parallel wells revealed positive reactive curves.

### Supplementary Figure

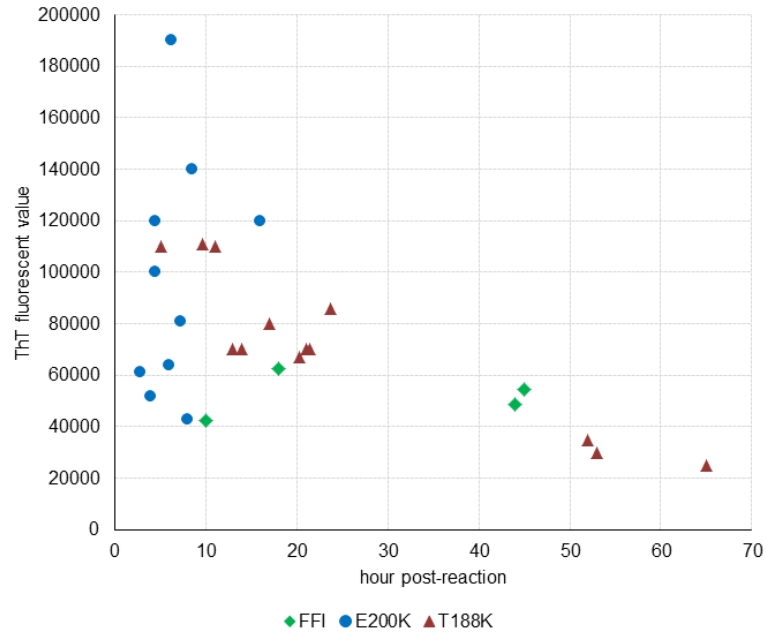

**Fig. S1** Dot-plot of positive reactive results of CSF RT-QuIC assays in the D178N-FFI, T188K-fCJD, and E200K-fCJD groups. Thirteen T188K-fCJD samples (brown triangles), 10 E200K-fCJD samples (blue dots), and 4 D178N-FFI samples (green diamonds) showing positive reactions were included. X-axis, hours post-reaction; Y-axis, ThT fluorescence values.

## Supplementary Table

**Table S1** Features of CSF 14-3-3, EEG, MRI, and CSF RT-QuIC in patients with T188K-fCJD, D178N-FFI, and E200K-fCJD

|            | Case number | Gender (M/F) | CSF 14-3-3<br>positive | PSWCs on<br>EEG | Abnormalities<br>on MRI | RT-QuIC<br>positive | Positive time<br>post-reaction<br>(h) (median) | Peak ThT<br>value (rfu)<br>(median) |
|------------|-------------|--------------|------------------------|-----------------|-------------------------|---------------------|------------------------------------------------|-------------------------------------|
| T188K-fCJD | 25          | 15/10        | 19 (76%)               | 4 (16%)         | 19 (76%)                | 13 (52%)            | 20.3                                           | 70000                               |
| D178N-FFI  | 24          | 10/14        | 5 (20.83%)             | 0 (0%)          | 2 (8.33%)               | 4 (16.7%)           | 31                                             | 51500                               |
| E200K-fCJD | 16          | 7/9          | 16 (100%)              | 9 (56.25%)      | 15 (93.75%)             | 10 (62.5%)          | 6.1                                            | 90500                               |
